# Supplementary material
Source: Springer Nature journal article supplement (https://www.springermedizin.de/resource/supplementary/13054_2011_9762_MOESM4_ESM.pdf/9706984)

EMP-MC/100 Monocytes

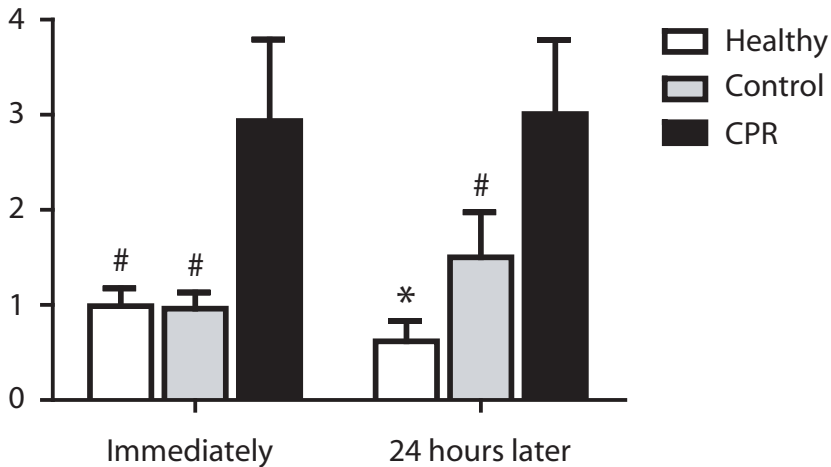

Supplement: MOESM4 [file 9706984]
